# Supplementary material for: Differences in MOPITT surface-level CO retrievals and trends from Level 2 and Level 3 products in coastal grid boxes
Source: Copernicus journal article supplement (doi:10.5194/amt-2022-90), 2022-04-06
Supplement: Supplementary file [file amt-2022-90-RC2-supplement.pdf]

Table 1

| city          | surface (miles <sup>2</sup> ) | surface (km <sup>2</sup> ) | L3 pixels | L2 pixels |
|---------------|-------------------------------|----------------------------|-----------|-----------|
| Chittagong    | 65                            | 168.35                     | 0.01      | 0.35      |
| Dubai         | 13.5                          | 34.97                      | 0.00      | 0.07      |
| Accra         | 87.13                         | 225.67                     | 0.02      | 0.47      |
| Sydney        | 4775                          | 12367.25                   | 1.00      | 25.55     |
| Wenzhou       | 4658                          | 12064.22                   | 0.98      | 24.93     |
| Abidjan       | 818                           | 2118.62                    | 0.17      | 4.38      |
| Yangon        | 231.2                         | 598.81                     | 0.05      | 1.24      |
| Qingdao       | 4335                          | 11227.65                   | 0.91      | 23.20     |
| Dar Es Salaam | 614                           | 1590.26                    | 0.13      | 3.29      |
| Surat         | 183                           | 473.97                     | 0.04      | 0.98      |
| Miami         | 55.25                         | 143.10                     | 0.01      | 0.30      |
| Toronto       | 243.3                         | 630.15                     | 0.05      | 1.30      |
| Hong Kong     | 427                           | 1105.93                    | 0.09      | 2.28      |
| Shantou       | 868                           | 2248.12                    | 0.18      | 4.64      |
| Singapore     | 281.3                         | 728.57                     | 0.06      | 1.51      |
| San Francisco | 46.87                         | 121.39                     | 0.01      | 0.25      |
| Luanda        | 43.63                         | 113.00                     | 0.01      | 0.23      |
| Saigon        | 809                           | 2095.31                    | 0.17      | 4.33      |
| Kuala Lumpur  | 93.82                         | 242.99                     | 0.02      | 0.50      |
| Taipei        | 104.9                         | 271.69                     | 0.02      | 0.56      |
| Xiamen        | 657                           | 1701.63                    | 0.14      | 3.52      |
| Chennai       | 164.5                         | 426.06                     | 0.03      | 0.88      |
| Istambul      | 2063                          | 5343.17                    | 0.43      | 11.04     |
| Buenos Aires  | 78.38                         | 203.00                     | 0.02      | 0.42      |
| Karachi       | 1459                          | 3778.81                    | 0.31      | 7.81      |
| Osaka         | 86.1                          | 223.00                     | 0.02      | 0.46      |
| Bangkok       | 606                           | 1569.54                    | 0.13      | 3.24      |
| Lagos         | 452                           | 1170.68                    | 0.10      | 2.42      |
| New York      | 302.6                         | 783.73                     | 0.06      | 1.62      |
| Mumbai        | 233                           | 603.47                     | 0.05      | 1.25      |
| Manila        | 14.88                         | 38.54                      | 0.00      | 0.08      |
| Shanghai      | 2448                          | 6340.32                    | 0.51      | 13.10     |
| Tokyo         | 847                           | 2193.73                    | 0.18      | 4.53      |
